# Supplementary material
Source: publisher figshare collection journal article supplement (https://acs.figshare.com/ndownloader/files/5115796)
Supplement: Supplementary file 1 [file 5115796]

## Supporting Information

# Control of Helix Formation by (E)- and (Z)-Double Bonds in Vinylogous $\gamma$ -Peptides – A Way to Ion Channels and Monomolecular Nanotubes

*Carsten Baldauf, Robert Günther and Hans-Jörg Hofmann\**

Institute of Biochemistry, Faculty of Biosciences, Pharmacy and Psychology, University of Leipzig,

Brüderstraße 34, D-04103 Leipzig, Germany

e-mail: hofmann@uni-leipzig.de

### Contents

Table S1: DFT/B3LYP/6-31G\* Backbone Torsion Angles of the Conformers of **1** (n=1) ... S1

Table S2: PCM/HF/6-31G\* Backbone Torsion Angles of the Conformers of **1** (n=1) ... S2

Table S3: DFT/B3LYP/6-31G\* Backbone Torsion Angles of the Conformers of **1** (n=6, derived from the monomers) ... S3

Table S4: DFT/B3LYP/6-31G\* Backbone Torsion Angles of the Conformers of **1** (n=6, obtained in the oligomer approach) ... S4

Table S5: Relative Enthalpies, Free Enthalpies and Entropies of the Conformers of **1** (n=6) ... S5

Table S6: DFT/B3LYP/6-31G\* Backbone Torsion Angles of the Conformers of **2** (n=1) ... S6

Table S7: PCM/HF/6-31G\* Backbone Torsion Angles of the Conformers of **2** (n=1) ... S7

Table S8: DFT/B3LYP/6-31G\* Backbone Torsion Angles of the Conformers of **2** (n=6) ... S8

Table S9: Relative Enthalpies, Free Enthalpies and Entropies of the Conformers of **2** (n=6) ... S9

Table S10: HF/6-31G\* Backbone Torsion Angles of the Conformers of **1** (n=11) ... S10

Coordinate files in the 'pdb'-format are given for all hexamer structures and the undecamers H<sub>22</sub><sup>I</sup> and H<sub>27</sub><sup>I</sup>.

**Table S1.** DFT/B3LYP/6-31G\* Backbone Torsion Angles<sup>a</sup> for the Unsubstituted (U) and  $\gamma$ -Methyl-Substituted (G) Blocked Conformers of **1** (n=1)

| Conf. | $\varphi$ | $\theta$ | $\zeta$ | $\psi$ | Conf. | $\varphi$ | $\theta$                       | $\zeta$ | $\psi$ |
|-------|-----------|----------|---------|--------|-------|-----------|--------------------------------|---------|--------|
| U1    | -126.3    | -126.4   | -179.4  | -177.6 | G3a   | -129.0    | 11.4                           | 179.6   | -176.3 |
|       |           |          |         |        | G3b   | -134.9    | 9.7                            | 177.2   | 27.3   |
| U2a   | -84.7     | 104.4    | -178.4  | 178.2  |       |           |                                |         |        |
| U2b   | -87.9     | 123.3    | 176.1   | 33.6   | G4a   | 64.7      | 122.2                          | 179.5   | -178.4 |
| U2c   | -95.5     | 111.9    | -176.9  | -28.8  | G4b   | 59.9      | 118.5                          | 176.5   | 23.1   |
|       |           |          |         |        | G4b'  |           | $\rightarrow$ G1c <sup>b</sup> |         |        |
| U3a   | -121.6    | 11.7     | 179.6   | 176.4  | G4c   | 61.2      | 122.7                          | -178.3  | -24.6  |
| U3b   | -121.3    | 9.7      | 177.0   | 26.7   | G4c'  |           | $\rightarrow$ G1b <sup>b</sup> |         |        |
| U3c   | -113.5    | 6.5      | -176.6  | -31.2  |       |           |                                |         |        |
|       |           |          |         |        | G5a   |           | $\rightarrow$ G2a <sup>b</sup> |         |        |
| U4a   | -115.5    | -121.9   | 177.1   | 29.2   | G5b   | -160.1    | 114.7                          | -178.1  | -31.6  |
| U4b   | -114.8    | -121.2   | -176.5  | -25.7  |       |           |                                |         |        |
|       |           |          |         |        | G6a   | -165.2    | -25.1                          | -177.9  | 178.2  |
| G1a   | -139.7    | -128.6   | 179.9   | 178.1  | G6b   | -163.5    | -23.5                          | 178.1   | 29.3   |
| G1b   | -129.0    | -124.8   | 176.5   | 30.2   |       |           |                                |         |        |
| G1c   | -124.6    | -123.6   | -177.2  | -26.2  | G7a   | 75.2      | -6.7                           | -180.0  | 175.0  |
|       |           |          |         |        | G7b   | 71.3      | 9.4                            | 175.7   | 33.8   |
| G2a   | -84.5     | 102.9    | -178.3  | 177.8  | G7b'  | -122.0    | 5.9                            | -176.2  | -31.3  |
| G2a'  | 66.1      | -127.6   | -179.2  | -175.1 | G7c   | 75.0      | 5.5                            | -178.9  | -23.3  |
| G2b   | -88.0     | 119.5    | 176.0   | 33.7   |       |           |                                |         |        |
| G2b'  | 47.3      | -148.2   | 179.7   | -36.0  |       |           |                                |         |        |
| G2c   | -96.2     | 109.5    | -176.7  | -29.5  |       |           |                                |         |        |
| G2c'  | 61.2      | -150.5   | -179.1  | 23.7   |       |           |                                |         |        |

<sup>a</sup> Torsion angles in degrees. <sup>b</sup> Optimization leads to the conformer after the arrow.

**Table S2.** PCM/HF/6-31G\* Backbone Torsion Angles<sup>a</sup> for the Unsubstituted (U) and  $\gamma$ -Methyl- Substituted (G) Blocked Conformers of **1** (n=1)

| Conf. | $\varphi$ | $\theta$ | $\zeta$ | $\psi$ | Conf. | $\varphi$ | $\theta$                       | $\zeta$ | $\psi$ |
|-------|-----------|----------|---------|--------|-------|-----------|--------------------------------|---------|--------|
| U1    | -113.2    | -125.1   | -179.1  | -179.7 | G3a   | -95.1     | -3.7                           | -179.4  | 179.2  |
|       |           |          |         |        | G3b   | -131.6    | 8.8                            | 176.6   | 30.5   |
| U2a   | -87.7     | 130.3    | 178.3   | -180.0 |       |           |                                |         |        |
| U2b   | -87.1     | 130.2    | 175.6   | 30.0   | G4a   | 63.8      | 122.3                          | 178.8   | -179.8 |
| U2c   | -86.0     | 131.2    | -178.7  | -28.6  | G4b   | 64.1      | 122.0                          | 175.7   | 28.8   |
|       |           |          |         |        | G4b'  |           | $\rightarrow$ G1c <sup>b</sup> |         |        |
| U3a   | -93.4     | -0.4     | -179.8  | 179.7  | G4c   | 63.5      | 121.4                          | -178.3  | -27.7  |
| U3b   | -95.5     | 0.9      | 177.1   | 29.2   | G4c'  |           | $\rightarrow$ G1b <sup>b</sup> |         |        |
| U3c   | -93.4     | -1.8     | -176.8  | -30.5  |       |           |                                |         |        |
|       |           |          |         |        | G5a   | -130.2    | 125.9                          | 178.9   | 179.9  |
| U4a   | -89.5     | -123.7   | 177.6   | 29.0   | G5b   |           | $\rightarrow$ G2c <sup>b</sup> |         |        |
| U4b   | -87.4     | -125.7   | -176.2  | -28.6  |       |           |                                |         |        |
|       |           |          |         |        | G6a   |           | $\rightarrow$ G3a <sup>b</sup> |         |        |
| G1a   | -135.9    | -128.4   | -179.2  | 179.5  | G6b   | -102.3    | -0.9                           | 177.8   | 28.8   |
| G1b   | -132.0    | -125.4   | 177.5   | 31.4   |       |           |                                |         |        |
| G1c   | -135.2    | -128.0   | -176.4  | -31.2  | G7a   | 72.6      | 7.6                            | 178.1   | -179.5 |
|       |           |          |         |        | G7b   | 72.3      | 8.9                            | 174.9   | 30.7   |
| G2a   | -92.9     | 125.4    | 178.9   | -179.2 | G7b'  | -92.0     | -6.4                           | -176.2  | -31.3  |
| G2a'  | 60.6      | -145.8   | -177.2  | -177.6 | G7c   | 73.3      | 4.9                            | -178.8  | -26.8  |
| G2b   | -91.6     | 124.5    | 176.0   | 29.4   |       |           |                                |         |        |
| G2b'  | 63.2      | -144.7   | -173.7  | -27.1  |       |           |                                |         |        |
| G2c   | -91.7     | 121.8    | -177.6  | -29.5  |       |           |                                |         |        |
| G2c'  | 62.4      | -144.7   | -179.7  | 28.7   |       |           |                                |         |        |

<sup>a</sup> Torsion angles in degrees. <sup>b</sup> Optimization leads to the conformer after the arrow.

**Table S3.** DFT/B3LYP/6-31G\* Backbone Torsion Angles<sup>a</sup> of all Periodic Hexamer Structures **1** (n=6) Derived from the Monomer Conformers U in Table 1

| Conf.                                               | φ      | θ      | ζ      | ψ      | Conf. <sup>b</sup> | φ      | θ      | ζ      | ψ     |
|-----------------------------------------------------|--------|--------|--------|--------|--------------------|--------|--------|--------|-------|
| (U1) <sub>6</sub>                                   | -122.7 | -126.3 | -179.5 | 177.0  | (U3b) <sub>6</sub> | -121.0 | 9.1    | 177.2  | 26.3  |
|                                                     | -124.2 | -126.2 | -179.5 | 177.0  |                    | -114.2 | 10.2   | 177.2  | 26.8  |
|                                                     | -126.3 | -126.5 | -179.6 | 177.4  |                    | -115.6 | 10.8   | 177.2  | 27.4  |
|                                                     | -124.5 | -125.7 | -179.7 | 177.8  |                    | -111.6 | 10.5   | 177.2  | 27.0  |
|                                                     | -121.8 | -125.7 | -179.8 | 177.7  |                    | -111.1 | 9.9    | 177.1  | 26.8  |
|                                                     | -122.5 | -125.7 | -179.6 | 177.2  |                    | -114.0 | 9.2    | 177.2  | 25.1  |
| (U2a) <sub>6</sub>                                  | -84.4  | 101.9  | -178.4 | 177.5  | (U3c) <sub>6</sub> | -112.8 | 6.9    | -177.1 | -28.8 |
|                                                     | -84.9  | 102.3  | -178.1 | 176.8  |                    | -118.6 | 6.8    | -177.1 | -28.6 |
|                                                     | -85.4  | 104.4  | -178.8 | 177.1  |                    | -120.7 | 7.8    | -177.0 | -28.4 |
|                                                     | -86.4  | 105.9  | -178.8 | 177.7  |                    | -117.5 | 6.6    | -176.9 | -28.8 |
|                                                     | -85.8  | 104.9  | -178.8 | 177.3  |                    | -120.6 | 6.8    | -176.9 | -29.1 |
|                                                     | -85.9  | 104.6  | -178.5 | 177.7  |                    | -125.2 | 7.9    | -176.5 | -29.8 |
| (U2b) <sub>6</sub>                                  | -80.0  | 124.1  | 177.4  | 32.1   | (U4a) <sub>6</sub> | -113.3 | -122.1 | 177.4  | 26.3  |
|                                                     | -77.8  | 117.3  | 178.4  | 31.5   |                    | -82.1  | -122.2 | 177.9  | 24.1  |
|                                                     | -79.5  | 115.6  | 178.4  | 30.5   |                    | -83.7  | -121.7 | 177.6  | 24.5  |
|                                                     | -80.7  | 117.3  | 178.1  | 30.8   |                    | -82.8  | -122.9 | 178.0  | 23.3  |
|                                                     | -80.1  | 118.4  | 177.9  | 32.7   |                    | -90.4  | -122.1 | 177.5  | 24.2  |
|                                                     | -81.9  | 120.4  | 176.7  | 33.1   |                    | -88.3  | -121.9 | 177.3  | 27.6  |
| (U2c) <sub>6</sub> (H <sub>27</sub> <sup>II</sup> ) | -94.5  | 120.2  | -177.8 | -22.8  | (U4b) <sub>6</sub> | -87.0  | -123.6 | 178.2  | 23.1  |
|                                                     | -111.8 | 125.8  | -177.4 | -24.7  |                    | -78.8  | -122.1 | -176.6 | -26.0 |
|                                                     | -81.9  | 136.0  | 176.2  | 37.6   |                    | -116.0 | -122.9 | -176.6 | -25.4 |
|                                                     | 127.8  | 125.1  | -176.2 | -25.9  |                    | -117.7 | -124.0 | -176.0 | -26.2 |
|                                                     | -80.8  | 97.1   | -172.9 | -38.1  |                    | -115.3 | -123.8 | -175.9 | -27.2 |
|                                                     | -87.4  | 106.6  | -175.8 | -34.3  |                    | -124.8 | -122.7 | -176.3 | -26.7 |
| (U3a) <sub>6</sub>                                  | -113.5 | 10.7   | 178.7  | -175.2 |                    |        |        |        |       |
|                                                     | -103.5 | 9.9    | 178.5  | -175.4 |                    |        |        |        |       |
|                                                     | -105.3 | 9.7    | 178.9  | -176.3 |                    |        |        |        |       |
|                                                     | -107.1 | 10.2   | 178.9  | -176.4 |                    |        |        |        |       |
|                                                     | -108.6 | 10.0   | 178.9  | -176.3 |                    |        |        |        |       |
|                                                     | -113.9 | 11.4   | 179.6  | -176.8 |                    |        |        |        |       |

<sup>a</sup> Angles in degrees.

**Table S4.** DFT/B3LYP/6-31G\* Backbone Torsion Angles<sup>a</sup> for the Hydrogen-Bonded Helical Structures of the Hexamer **1** (n=6) Found in the Oligomer Approach

| Conf. <sup>b</sup>           | φ      | θ      | ζ      | ψ      | Conf. <sup>b</sup>            | φ      | θ      | ζ      | ψ     |
|------------------------------|--------|--------|--------|--------|-------------------------------|--------|--------|--------|-------|
| H <sub>14</sub>              | 67.8   | 18.6   | -164.3 | 165.7  | H <sub>22</sub> <sup>II</sup> | 114.6  | -125.5 | 176.8  | 28.4  |
|                              | 65.0   | 12.9   | -163.0 | 166.0  |                               | 103.1  | -117.3 | 173.1  | 33.7  |
|                              | 65.6   | 15.5   | -162.7 | 161.8  |                               | 99.4   | -108.3 | 172.7  | 34.3  |
|                              | 65.5   | 16.4   | -163.6 | 162.2  |                               | 91.2   | -104.6 | 172.6  | 35.1  |
|                              | 68.6   | 12.3   | -163.1 | 155.3  |                               | 85.0   | -101.9 | 170.4  | 38.9  |
|                              | 84.1   | -7.1   | -179.2 | 178.8  |                               | 88.0   | -101.5 | 173.3  | 38.1  |
| H <sub>17</sub>              | -152.6 | -131.1 | 175.9  | 14.0   | H <sub>24</sub>               | 75.9   | -118.9 | 175.4  | 32.1  |
|                              | 81.7   | -100.8 | 163.7  | 35.8   |                               | 73.8   | -127.7 | 171.4  | 38.2  |
|                              | 95.0   | -99.3  | 166.3  | 37.6   |                               | 82.7   | -118.3 | 177.5  | -35.6 |
|                              | 83.2   | -97.6  | 163.8  | 46.3   |                               | 104.3  | -116.1 | 171.6  | 29.6  |
|                              | 85.8   | -96.9  | 162.7  | 42.4   |                               | 95.3   | -116.6 | -177.5 | -20.9 |
|                              | 82.5   | -91.6  | 169.5  | 44.1   |                               | 104.3  | -129.5 | -174.1 | -19.6 |
| H <sub>19</sub>              | 78.1   | 7.8    | 171.6  | -175.6 | H <sub>27</sub> <sup>I</sup>  | 117.7  | 111.2  | 179.9  | 167.4 |
|                              | 69.3   | 31.1   | -171.7 | 174.4  |                               | 74.0   | 113.3  | 177.5  | 166.8 |
|                              | 84.4   | 12.7   | -171.4 | -173.3 |                               | 73.1   | 108.1  | 179.0  | 161.6 |
|                              | 88.7   | 10.9   | -169.9 | 179.0  |                               | 68.1   | 108.5  | 179.0  | 163.7 |
|                              | 92.2   | 12.3   | -174.1 | -177.3 |                               | 70.8   | 117.2  | 177.9  | 171.1 |
|                              | 117.7  | -3.9   | -179.1 | -176.9 |                               | 78.4   | 127.2  | 177.4  | 177.1 |
| H <sub>22</sub> <sup>I</sup> | 122.1  | 115.8  | -178.4 | 167.6  | H <sub>27</sub> <sup>II</sup> | -94.5  | 120.2  | -177.8 | -22.8 |
|                              | 75.8   | 104.2  | -175.9 | 159.5  |                               | -111.8 | 125.8  | -177.4 | -24.7 |
|                              | 64.8   | 106.0  | -174.2 | 159.5  |                               | -81.9  | 136.0  | 176.2  | 37.6  |
|                              | 72.3   | 106.2  | -172.8 | 160.6  |                               | 127.8  | 125.1  | -176.2 | -25.9 |
|                              | 70.8   | 105.0  | -176.0 | 160.4  |                               | -80.8  | 97.1   | -172.9 | -38.1 |
|                              | 72.2   | 131.2  | 178.0  | -175.6 |                               | -87.4  | 106.6  | -175.8 | -34.3 |

<sup>a</sup> Angles in degrees. <sup>b</sup> H<sub>x</sub> denotes a helix with x-membered hydrogen-bonded pseudocycles.

**Table S5.** Relative Enthalpies, Free Enthalpies, Entropies, and Total Energies<sup>a</sup> at the HF/6-31G\* level of ab initio MO theory of the Conformers of **1** (n=6)

| Conf. <sup>b</sup>                                | $\Delta H$ | $\Delta G$ | $\Delta S$ | $E_T$        |
|---------------------------------------------------|------------|------------|------------|--------------|
| (U1) <sub>6</sub>                                 | 32.8       | <b>0.0</b> | <b>0.0</b> | -1949.197490 |
| (U2a) <sub>6</sub>                                | 42.2       | 19.1       | -32.4      | -1949.193825 |
| (U2b) <sub>6</sub>                                | 102.5      | 82.3       | -42.3      | -1949.170561 |
| (U3a) <sub>6</sub>                                | 28.3       | 13.0       | -58.7      | -1949.198833 |
| (U3b) <sub>6</sub>                                | 105.5      | 88.6       | -53.2      | -1949.169537 |
| (U3c) <sub>6</sub>                                | 90.8       | 70.6       | -42.2      | -1949.175084 |
| (U4a) <sub>6</sub>                                | 66.2       | 54.1       | -69.6      | -1949.185375 |
| (U4b) <sub>6</sub>                                | 79.9       | 56.3       | -30.6      | -1949.179535 |
| H <sub>14</sub>                                   | 41.8       | 72.8       | -213.7     | -1949.196331 |
| H <sub>17</sub>                                   | 68.3       | 95.8       | -202.1     | -1949.185944 |
| H <sub>19</sub>                                   | 4.2        | 30.6       | -198.5     | -1949.209514 |
| H <sub>22</sub> <sup>I</sup>                      | <b>0.0</b> | 21.4       | -181.7     | -1949.211533 |
| H <sub>22</sub> <sup>II</sup>                     | 65.3       | 78.1       | -152.8     | -1949.186045 |
| H <sub>24</sub>                                   | 73.1       | 89.4       | -164.9     | -1949.183072 |
| H <sub>27</sub> <sup>I</sup>                      | 14.9       | 26.5       | -148.9     | -1949.204979 |
| H <sub>27</sub> <sup>II</sup> /(U2c) <sub>6</sub> | 61.5       | 69.7       | -137.5     | -1949.187053 |

<sup>a</sup> Relative enthalpies and relative free enthalpies in kJ/mol; relative entropies in J/mol·K; total energies in a.u. <sup>b</sup> H<sub>x</sub> denotes a helix with x-membered hydrogen-bonded pseudocycles.

**Table S6.** DFT/B3LYP/6-31G\* Backbone Torsion Angles<sup>a</sup> for the Unsubstituted and  $\gamma$ -Methyl-Substituted (G) Blocked Conformers of **2** (n=1)

| Conf. | $\varphi$ | $\theta$ | $\zeta$ | $\psi$ | Type <sup>b</sup>            | Conf. | $\varphi$ | $\theta$          | $\zeta$ | $\psi$ | Type <sup>b</sup>            |
|-------|-----------|----------|---------|--------|------------------------------|-------|-----------|-------------------|---------|--------|------------------------------|
| U1    | 91.1      | 69.2     | -0.5    | 168.1  | C <sub>7</sub>               | G4    | -69.5     | 154.3             | -1.4    | -166.9 |                              |
| U2    | 81.3      | -119.7   | -2.0    | 42.5   | C <sub>9</sub>               | G5    | 62.3      | 138.9             | -0.7    | -175.0 |                              |
| U3    | 117.9     | 128.5    | -0.8    | 44.5   |                              | G6    |           | → G2 <sup>c</sup> |         |        |                              |
| U4    | 177.8     | -82.0    | -2.7    | 29.7   | C <sub>7</sub> *             | G7    | -159.0    | 122.9             | -3.5    | 46.2   |                              |
| U5    | -123.6    | -127.2   | -1.4    | 48.1   |                              | G8    | 63.2      | 123.7             | -0.7    | 43.7   |                              |
| U6    | 107.5     | 44.1     | -0.2    | 35.0   |                              | G9    | 66.5      | -117.3            | 2.4     | 63.1   | C <sub>9</sub> <sup>ax</sup> |
| U7    | 127.5     | -135.3   | 2.9     | -38.2  |                              | G10   | 57.5      | 86.8              | -2.2    | -33.7  | C <sub>7</sub> *             |
|       |           |          |         |        |                              | G11   | -95.2     | -18.2             | -1.3    | -65.3  |                              |
| G1    | -81.2     | 118.9    | 1.7     | -43.2  | C <sub>9</sub> <sup>eq</sup> | G12   | -70.7     | -65.1             | 1.5     | 29.5   | C <sub>7</sub> *             |
| G2    | -113.6    | -47.7    | 0.0     | -177.8 | C <sub>7</sub> <sup>ax</sup> | G13   | -160.8    | -56.7             | -2.5    | 13.8   | C <sub>7</sub> *             |
| G3    | 61.9      | 73.1     | -1.0    | 170.4  | C <sub>7</sub> <sup>eq</sup> |       |           |                   |         |        |                              |

<sup>a</sup> Torsion angles in degrees. <sup>b</sup> C<sub>x</sub> denotes a hydrogen-bonded pseudocycle with *x* atoms, *eq*, *ax*: pseudoequatorial or pseudoaxial orientation of the C( $\gamma$ ) substituents. An asterisk denotes NH...N hydrogen bonding. <sup>c</sup> Optimization leads to the conformer after the arrow.

**Table S7.** PCM/HF/6-31G\* Backbone Torsion Angles<sup>a</sup> for the Unsubstituted and  $\gamma$ -Methyl-Substituted (G) Blocked Conformers of **2** (n=1)

| Conf. | $\varphi$ | $\theta$ | $\zeta$ | $\psi$ | Type <sup>b</sup>            | Conf. | $\varphi$ | $\theta$          | $\zeta$ | $\psi$ | Type <sup>b</sup>            |
|-------|-----------|----------|---------|--------|------------------------------|-------|-----------|-------------------|---------|--------|------------------------------|
| U1    | 88.5      | 119.8    | 0.0     | 168.5  | C <sub>7</sub>               | G4    | -93.2     | 144.3             | 0.0     | -167.3 |                              |
| U2    | 80.4      | -123.2   | 0.6     | 45.2   | C <sub>9</sub>               | G5    | 65.5      | 141.1             | -0.1    | -171.4 |                              |
| U3    | 89.1      | 128.6    | -0.6    | 54.1   |                              | G6    |           | → G4 <sup>c</sup> |         |        |                              |
| U4    | -131.0    | -125.0   | 0.3     | 59.8   | C <sub>7</sub> <sup>*</sup>  | G7    | -141.0    | 120.1             | -1.4    | 66.9   |                              |
| U5    | -91.6     | -125.0   | 0.1     | 59.1   |                              | G8    | 64.3      | 118.1             | -1.2    | 69.0   |                              |
| U6    | 82.4      | 15.3     | 0.3     | 77.8   |                              | G9    | 66.0      | -120.0            | 4.5     | 63.0   | C <sub>9</sub> <sup>ax</sup> |
| U7    | 88.1      | -139.0   | 1.8     | -52.1  |                              | G10   | 62.7      | 119.3             | -1.0    | -60.7  | C <sub>7</sub> <sup>*</sup>  |
|       |           |          |         |        |                              | G11   | -83.4     | -16.4             | 1.0     | -83.2  |                              |
| G1    | -81.6     | 122.3    | 0.0     | -46.3  | C <sub>9</sub> <sup>eq</sup> | G12   | -72.9     | -74.8             | 0.8     | 52.7   | C <sub>7</sub> <sup>*</sup>  |
| G2    | -108.7    | -46.0    | -0.8    | 175.8  | C <sub>7</sub> <sup>ax</sup> | G13   | -160.1    | -70.9             | -2.1    | 35.5   | C <sub>7</sub> <sup>*</sup>  |
| G3    | 58.6      | 93.5     | -2.1    | 168.6  | C <sub>7</sub> <sup>eq</sup> |       |           |                   |         |        |                              |

<sup>a</sup> Torsion angles in degrees. <sup>b</sup> C<sub>x</sub> denotes a hydrogen-bonded pseudocycle with *x* atoms, *eq*, *ax*: pseudoequatorial or pseudoaxial orientation of the C( $\gamma$ ) substituents. An asterisk denotes NH $\cdots$ N hydrogen bonding. <sup>c</sup> Optimization leads to the conformer after the arrow.



**Table S8.** DFT/B3LYP/6-31G\* Backbone Torsion Angles<sup>a</sup> of all Periodic Hexamer Structures either Derived from the Monomers U in Table 6 or Obtained in the Oligomer Approach on Hexamers of **2** (n=6)

| Conf. <sup>b</sup>               | φ          | θ    | ζ    | ψ     | Conf. <sup>b</sup> | φ            | θ     | ζ     | ψ    |
|----------------------------------|------------|------|------|-------|--------------------|--------------|-------|-------|------|
| H <sub>7</sub> (U1) <sub>6</sub> | 96.8       | 66.5 | -0.4 | 169.4 | H <sub>14</sub>    | 110.2-126.6  | 2.1   | 150.7 |      |
|                                  | 99.7       | 65.1 | -0.5 | 168.8 |                    | 77.3-102.0   | -8.2  | 136.1 |      |
|                                  | 97.9       | 64.9 | -0.4 | 168.9 |                    | 125.1-114.7  | 0.3   | 62.0  |      |
|                                  | 97.7       | 64.4 | -0.4 | 169.4 |                    | 176.9-114.7  | 1.7   | 67.2  |      |
|                                  | 99.2       | 63.8 | -0.3 | 170.0 |                    | 132.8 -95.2  | -4.6  | 140.4 |      |
|                                  | 97.2       | 67.0 | -0.6 | 167.4 |                    | 82.4-105.0   | -6.3  | 133.1 |      |
| H <sub>9</sub> (U2) <sub>6</sub> | 81.2-119.3 |      | -0.9 | 45.0  | H <sub>17</sub>    | -115.6-110.7 | -3.2  | 137.7 |      |
|                                  | 83.8-119.2 |      | -0.6 | 43.6  |                    | 169.0 -97.9  | -3.9  | 136.0 |      |
|                                  | 83.0-119.3 |      | -0.6 | 44.0  |                    | 164.6 -81.7  | 0.2   | 151.4 |      |
|                                  | 83.7-118.7 |      | -0.6 | 42.0  |                    | 143.7 -83.2  | -1.0  | 165.9 |      |
|                                  | 82.6-120.0 |      | -0.5 | 44.7  |                    | 134.9 -58.9  | -4.2  | 129.1 |      |
|                                  | 83.4-119.4 |      | -1.4 | 40.8  |                    | -149.6-151.3 | 0.5   | 172.1 |      |
| H <sub>12</sub>                  | 74.9       | 80.3 | -5.8 | 39.3  | (U3) <sub>6</sub>  | 116.7        | 129.3 | -0.7  | 44.8 |
|                                  | 66.6       | 70.8 | -2.0 | 62.1  |                    | 128.6        | 130.9 | -1.2  | 44.1 |
|                                  | 63.8       | 64.6 | -3.5 | 64.8  |                    | 129.1        | 129.1 | -1.2  | 45.8 |
|                                  | 66.9       | 64.4 | -3.3 | 66.8  |                    | 132.3        | 131.0 | -1.2  | 44.6 |
|                                  | 66.6       | 61.4 | -1.6 | 62.7  |                    | 128.5        | 129.8 | -1.2  | 45.1 |
|                                  | 62.4       | 70.5 | -2.4 | 74.2  |                    | 132.5        | 129.5 | -1.3  | 43.9 |

<sup>a</sup> Angles in degrees. <sup>b</sup> H<sub>x</sub> denotes a helix with hydrogen-bonded pseudocycles with *x* members.

**Table S9.** Relative Enthalpies, Free Enthalpies, Entropies, and Total Energies<sup>a</sup> at the HF/6-31G\* level of ab initio MO theory of the Conformers of **2** (n=6)

| Conf. <sup>b</sup>               | $\Delta H$ | $\Delta G$ | $\Delta S$ | $E_T$        |
|----------------------------------|------------|------------|------------|--------------|
| H <sub>7</sub> (U1) <sub>6</sub> | <b>0.0</b> | <b>0.0</b> | -62.1      | -1949.204844 |
| H <sub>9</sub> (U2) <sub>6</sub> | 1.2        | 24.2       | -139.3     | -1949.205023 |
| H <sub>12</sub>                  | 91.7       | 118.2      | -151.0     | -1949.168785 |
| H <sub>14</sub>                  | 57.6       | 86.0       | -157.4     | -1949.181578 |
| H <sub>17</sub>                  | 75.0       | 93.1       | -122.6     | -1949.174645 |
| (U3) <sub>6</sub>                | 135.7      | 117.2      | <b>0.0</b> | -1949.150232 |

<sup>a</sup> Relative enthalpies and relative free enthalpies in kJ/mol; relative entropies in J/mol·K; total energies in a.u. <sup>b</sup> H<sub>x</sub> denotes a helix with x-membered hydrogen-bonded pseudocycles.

**Table S10.** HF/6-31G\* Backbone Torsion  
Angles<sup>a</sup> of Selected Undecamer Structures  
**1** (n=11)

| Conf. <sup>b</sup>           | φ     | θ     | ζ      | ψ      |
|------------------------------|-------|-------|--------|--------|
| H <sub>19</sub>              | 77.8  | 14.6  | -173.5 | -174.9 |
|                              | 71.7  | 29.7  | -172.5 | -172.4 |
|                              | 76.8  | 21.6  | -172.4 | -173.3 |
|                              | 74.7  | 23.7  | -172.6 | -171.9 |
|                              | 76.0  | 27.3  | -172.8 | -174.9 |
|                              | 74.2  | 26.0  | -172.6 | -173.8 |
|                              | 73.3  | 29.6  | -173.1 | -176.0 |
|                              | 76.0  | 22.2  | -173.2 | -172.9 |
|                              | 83.0  | 21.6  | -172.7 | 177.2  |
|                              | 84.5  | 15.2  | -175.5 | -176.4 |
| H <sub>22</sub> <sup>I</sup> | 115.7 | -1.4  | 179.5  | -175.5 |
|                              | 115.1 | 116.5 | -177.9 | 164.2  |
|                              | 73.9  | 107.0 | -175.3 | 156.6  |
|                              | 68.8  | 108.9 | -173.2 | 158.1  |
|                              | 70.5  | 108.5 | -172.8 | 159.0  |
|                              | 71.5  | 111.0 | -173.7 | 156.5  |
|                              | 69.0  | 110.5 | -173.0 | 158.7  |
|                              | 70.8  | 109.6 | -172.6 | 158.1  |
|                              | 67.9  | 113.3 | -173.9 | 158.4  |
|                              | 69.8  | 109.3 | -173.1 | 156.2  |
| H <sub>27</sub> <sup>I</sup> | 68.7  | 111.0 | -175.6 | 161.5  |
|                              | 74.1  | 130.0 | 178.9  | -177.0 |
|                              | 101.0 | 114.3 | -179.9 | 166.3  |
|                              | 78.9  | 108.7 | 179.2  | 161.9  |
|                              | 73.2  | 112.0 | 179.4  | 161.2  |
|                              | 72.0  | 110.0 | -179.3 | 161.0  |
|                              | 71.7  | 112.4 | -179.3 | 163.0  |
|                              | 74.7  | 111.6 | -179.2 | 158.6  |
|                              | 69.8  | 116.5 | -179.8 | 161.5  |
|                              | 73.0  | 112.2 | -179.4 | 159.9  |
|                              | 71.3  | 112.9 | 179.5  | 160.2  |
|                              | 71.5  | 118.1 | 177.8  | 165.9  |
|                              | 75.8  | 131.9 | 176.8  | -179.9 |

<sup>a</sup> Angles in degrees. <sup>b</sup> H<sub>x</sub> denotes a helix with x-membered hydrogen-bonded pseudocycles;

total energies:

H<sub>19</sub>: E<sub>T</sub>=-3367.732121 a.u.

H<sub>22</sub><sup>I</sup>: E<sub>T</sub>=-3367.740976 a.u.

H<sub>27</sub><sup>I</sup>: E<sub>T</sub>=-3367.732464 a.u.
